# Supplementary material for: Hydrogenation of iron in the early stage of Earth's evolution
Source: PubMed Central journal article supplement (PMC5241797; doi:10.1038/ncomms14096), 2017-01-13
Supplement: ncomms14096-s1.pdf [file ncomms14096-s1.pdf]

## Supplementary Information

### Supplementary figures

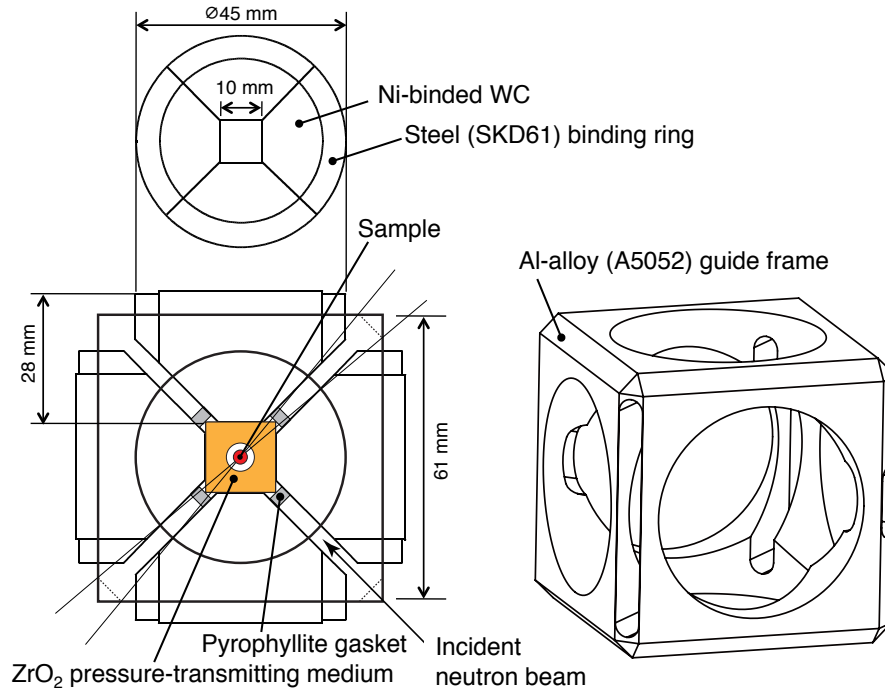

**Supplementary Figure 1 | Experimental setup.** Newly designed anvil assembly with 6-6-type multi-anvil cells.

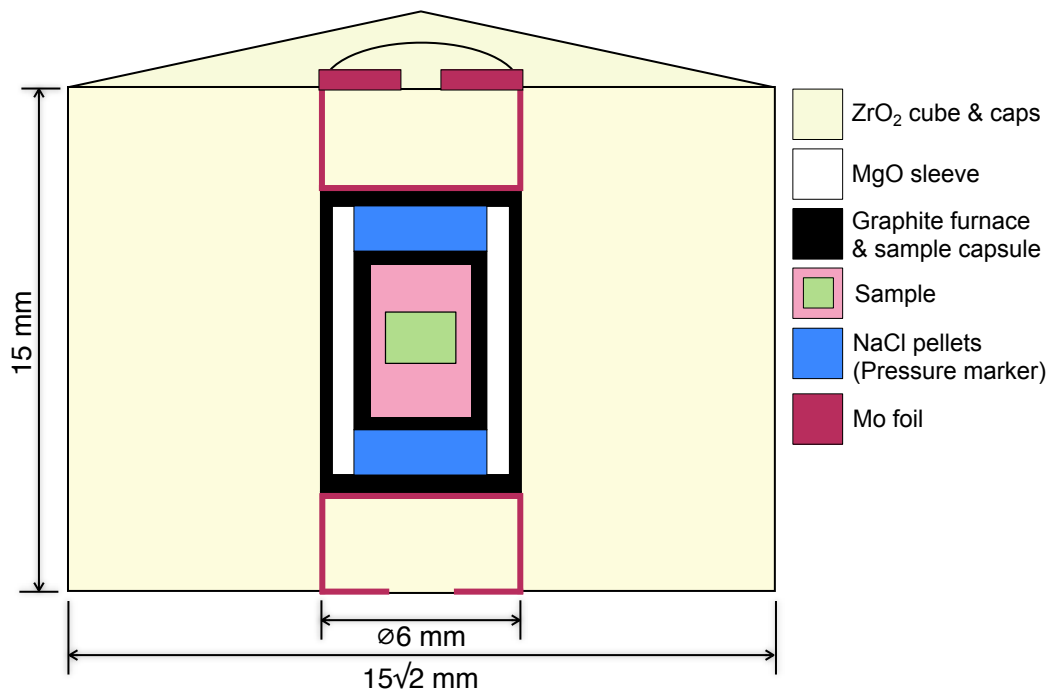

**Supplementary Figure 2 | Experimental setup.** Cross-section of the cell assembly.

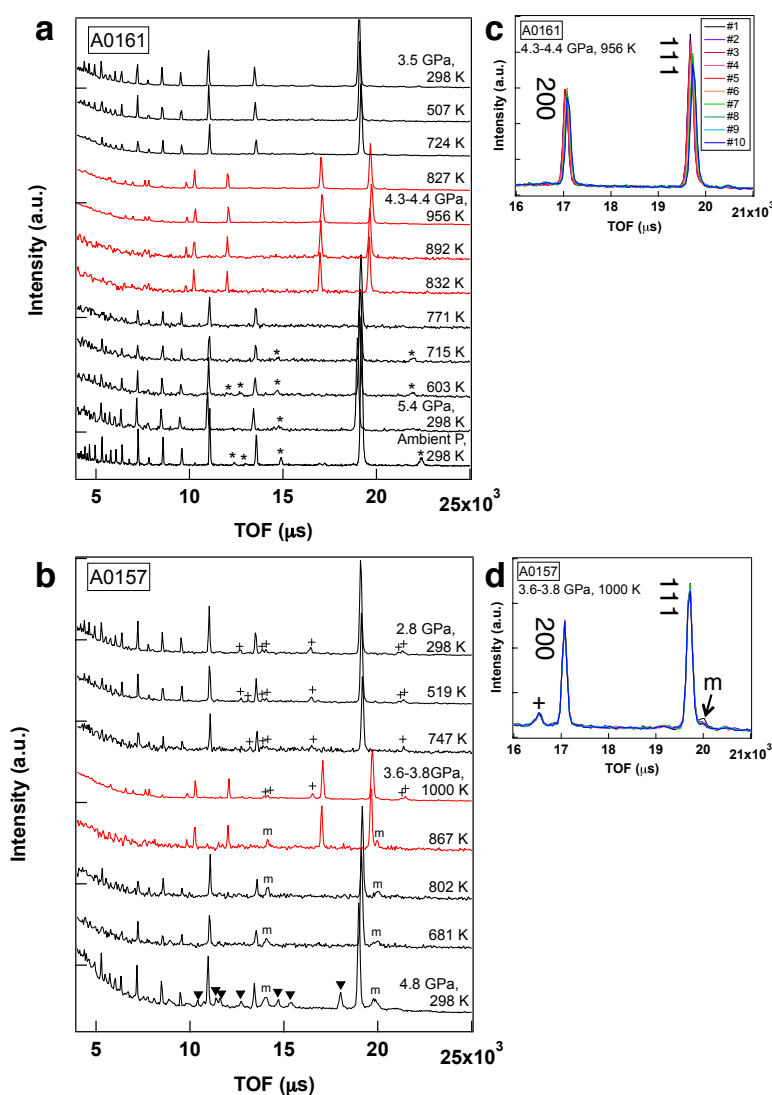

**Supplementary Figure 3 | Entire dataset of powder neutron diffraction patterns obtained in runs (a) #A0161 and (b) #A0157.** The series of observations was made from bottom to top. The red patterns show diffractions when iron or its hydride was in an *fcc* structure. In #A0161  $\text{Mg}(\text{OD})_2$  (marked with “\*”) was observed before dehydration occurred, as in #A0156 (Figure 1) while in #A0157  $\text{MgO}$  (marked with “m”) was observed. Both of them disappeared after olivine (marked with “+”) was formed. Data at 4.8 GPa and 298 K in #A0157 was obtained using wide slit (1.0w x 5.3h) to get diffractions from NaCl pressure marker (marked with “▼”). The two strong diffraction peaks of *fcc* iron or its hydride, 111 and 200, measured every hour for ~10 hours, are shown on the right figures, (c) and (d). Note that all the peaks for #A0157 completely overlap, indicating that there were no changes in both the positions and the line width, while the peaks for #A0161 shifted slightly to the right with time, without changing the line width.

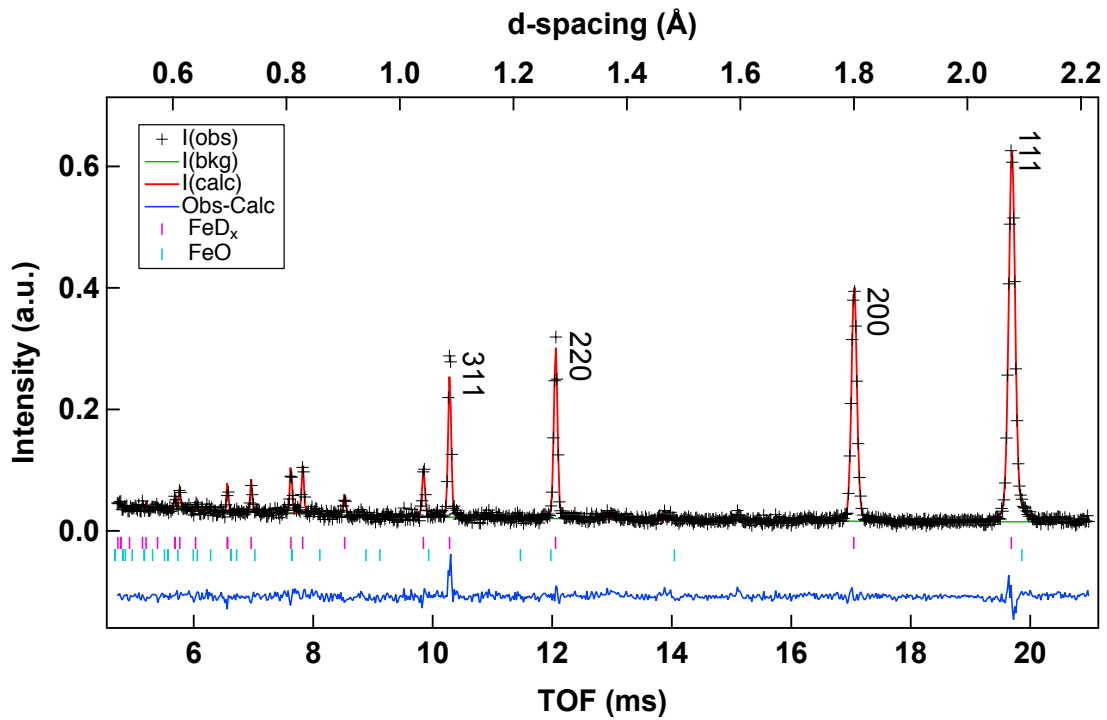

**Supplementary Figure 4 | Results of the Rietveld analysis for one hour data collected in #A0161.**

“+” denotes observed data points; the solid red line denotes the calculated profile. Tick marks below the pattern show the positions of diffraction peaks calculated for FeD<sub>x</sub> (upper row) and FeO (lower row). The difference between the observed and calculated profiles is shown at the bottom.

## Supplementary Tables

**Supplementary Table 1 | Summary of experimental conditions and results.**

| Run#  | $P$ max<br>(kN / GPa) | $T$ max<br>(K) | Starting material                           | Products                   |
|-------|-----------------------|----------------|---------------------------------------------|----------------------------|
| A0161 | 1200 / 5.4            | 956            | Fe + Mg(OD) <sub>2</sub> + SiO <sub>2</sub> | Fe, FeO, olivine, pyroxene |
| A0156 | 1000 / 4.9            | 1000           | Fe + Mg(OD) <sub>2</sub> + SiO <sub>2</sub> | Fe, FeO, olivine, pyroxene |
| A0157 | 1000 / 4.8            | 1000           | Fe + MgO + SiO <sub>2</sub>                 | Fe, olivine, pyroxene      |

**Supplementary Table 2 | Results of volume change and deuteration from Rietveld analysis measured during a long holding time.** Notes: \*Elapsed time since the start of measurements after holding at the maximum temperature; †Pressures calculated from NaCl, for which data were obtained shortly before the sample measurements, are given (see also Fig. 2); ‡Each zero-volume ( $V_0$ ) was taken from the initial value of the long holding time. Errors were estimated based on the standard deviation of Rietveld analysis. Values for #A0157 under dry condition are too low to be meaningful.  $g_D(O)$  and  $g_D(T)$  represent site occupancies of deuterium in the O and T sites, respectively.  $U_{iso}$  is the isotropic atomic displacement parameter, constrained to be identical for the same D species. Deuterium content is denoted by  $x$ .

| Run#  | Data# | Time *<br>(hh:mm:ss) | $P^\dagger$<br>(GPa) | $T$<br>(K) | $a$<br>(Å) | $V$<br>(Å <sup>3</sup> ) | $\Delta V^\ddagger$<br>(%) | $g_D(O)$  | $g_D(T)$  | $U_{iso\_Fe}$<br>(100 x Å <sup>2</sup> ) | $U_{iso\_D}$<br>(100 x Å <sup>2</sup> ) | $R_{wp}$<br>(%) | $R_p$<br>(%) | $x$     | $x$<br>(wt.%) |
|-------|-------|----------------------|----------------------|------------|------------|--------------------------|----------------------------|-----------|-----------|------------------------------------------|-----------------------------------------|-----------------|--------------|---------|---------------|
| A0161 | 16625 | 0:36:14              | 4.3                  | 956        | 3.6011(1)  | 46.697(5)                | 0                          | 0.116(12) | 0.018(10) | 1.1                                      | 4.5                                     | 14.1            | 11.1         | 0.15(2) | 0.54(3)       |
|       | 16626 | 1:47:05              |                      |            | 3.6012(1)  | 46.701(4)                | 0.01(1)                    | 0.147(10) | 0.039(9)  | 1.2                                      | 5.0                                     | 12.0            | 10.3         | 0.23(2) | 0.81(2)       |
|       | 16627 | 2:56:15              |                      |            | 3.6012(1)  | 46.727(4)                | 0.06(1)                    | 0.130(11) | 0.017(10) | 1.1                                      | 5.1                                     | 13.4            | 11.4         | 0.16(2) | 0.58(3)       |
|       | 16629 | 4:30:22              | 4.4                  |            | 3.6030(1)  | 46.771(4)                | 0.16(1)                    | 0.118(10) | 0.006(9)  | 1.1                                      | 3.3                                     | 12.8            | 11.0         | 0.13(2) | 0.46(2)       |
|       | 16630 | 5:39:15              |                      |            | 3.6040(1)  | 46.812(4)                | 0.25(1)                    | 0.132(11) | 0.016(10) | 1.1                                      | 5.2                                     | 13.5            | 11.3         | 0.16(2) | 0.58(3)       |
|       | 16631 | 6:49:20              |                      |            | 3.6056(1)  | 46.875(4)                | 0.38(1)                    | 0.137(11) | 0.013(10) | 1.2                                      | 4.6                                     | 13.0            | 11.3         | 0.16(2) | 0.59(3)       |
|       | 16633 | 8:23:44              | 4.4                  |            | 3.6098(1)  | 47.040(5)                | 0.73(2)                    | 0.194(12) | 0.037(12) | 1.4                                      | 6.3                                     | 13.9            | 11.7         | 0.27(2) | 0.96(3)       |
|       | 16634 | 9:43:43              |                      |            | 3.6117(1)  | 47.112(5)                | 0.89(2)                    | 0.157(10) | 0.030(10) | 1.2                                      | 4.4                                     | 15.6            | 11.9         | 0.22(2) | 0.77(3)       |
|       | 16635 | 10:59:17             |                      |            | 3.6120(1)  | 47.126(5)                | 0.92(2)                    | 0.149(10) | 0.029(9)  | 1.2                                      | 4.1                                     | 11.7            | 10.8         | 0.21(2) | 0.74(2)       |
|       | 16637 | 12:33:37             | 4.3                  |            | 3.6126(1)  | 47.147(5)                | 0.96(2)                    | 0.142(10) | 0.011(9)  | 1.1                                      | 3.9                                     | 13.5            | 11.2         | 0.16(2) | 0.59(2)       |

**Supplementary Table 2 (continued)**

| Run#  | Data# | Time <sup>*</sup><br>(hh:mm:ss) | $P^\dagger$<br>(GPa) | $T$<br>(K) | $a$<br>(Å) | $V$<br>(Å <sup>3</sup> ) | $\Delta V^\ddagger$<br>(%) | gD(O)     | gD(T)     | $U_{\text{iso\_Fe}}$<br>(100 x Å <sup>2</sup> ) | $U_{\text{iso\_D}}$<br>(100 x Å <sup>2</sup> ) | $R_{\text{wp}}$<br>(%) | $R_p$<br>(%) | $x$     | $x$<br>(wt.%) |
|-------|-------|---------------------------------|----------------------|------------|------------|--------------------------|----------------------------|-----------|-----------|-------------------------------------------------|------------------------------------------------|------------------------|--------------|---------|---------------|
| A0156 | 16473 | 0:31:35                         | 3.9                  | 1000       | 3.6070(1)  | 46.929(4)                | 0                          | 0.125(9)  | 0.024(8)  | 1.2                                             | 3.9                                            | 12.0                   | 10.5         | 0.17(2) | 0.62(2)       |
|       | 16474 | 1:41:57                         |                      |            | 3.6080(1)  | 46.965(4)                | 0.08(1)                    | 0.101(11) | 0.003(9)  | 1.2                                             | 3.7                                            | 11.6                   | 9.60         | 0.18(2) | 0.66(3)       |
|       | 16475 | 2:49:55                         |                      |            | 3.6089(1)  | 47.005(4)                | 0.16(1)                    | 0.130(11) | 0.014(10) | 1.3                                             | 5.2                                            | 12.8                   | 10.3         | 0.16(2) | 0.56(3)       |
|       | 16476 | 3:57:52                         |                      |            | 3.6104(1)  | 47.061(4)                | 0.28(1)                    | 0.125(9)  | 0.011(8)  | 1.2                                             | 4.9                                            | 11.0                   | 9.67         | 0.15(2) | 0.52(2)       |
|       | 16477 | 5:07:19                         |                      |            | 3.6138(1)  | 47.195(4)                | 0.57(1)                    | 0.132(9)  | 0.016(8)  | 1.3                                             | 4.2                                            | 11.7                   | 9.61         | 0.16(2) | 0.58(2)       |
|       | 16478 | 6:17:17                         |                      |            | 3.6156(1)  | 47.263(4)                | 0.71(1)                    | 0.150(9)  | 0.013(8)  | 1.3                                             | 3.3                                            | 11.3                   | 10.2         | 0.17(2) | 0.62(2)       |
|       | 16479 | 7:25:16                         |                      |            | 3.6161(1)  | 47.285(5)                | 0.76(1)                    | 0.149(10) | 0.016(9)  | 1.2                                             | 4.2                                            | 12.3                   | 10.8         | 0.18(2) | 0.64(2)       |
|       | 16480 | 8:33:13                         |                      |            | 3.6161(1)  | 47.285(5)                | 0.76(1)                    | 0.138(10) | 0.010(9)  | 1.2                                             | 5.2                                            | 12.6                   | 10.5         | 0.16(2) | 0.56(2)       |
|       | 16481 | 9:43:25                         |                      |            | 3.6169(1)  | 47.318(4)                | 0.83(1)                    | 0.149(10) | 0.021(9)  | 1.3                                             | 4.1                                            | 11.4                   | 10.6         | 0.19(2) | 0.68(2)       |
| A0157 | 16547 | 0:23:22                         | 3.8                  | 1000       | 3.6073(1)  | 46.940(5)                | -                          | 0.110(11) | -         | 2.2                                             | 7.2                                            | 17.0                   | 12.0         | 0.11(1) | 0.39(2)       |
|       | 16548 | 1:31:26                         |                      |            | 3.6069(1)  | 46.925(5)                | -                          | 0.125(11) | 0.019(10) | 1.2                                             | 3.1                                            | 18.9                   | 12.5         | 0.16(2) | 0.58(3)       |
|       | 16549 | 2:39:31                         |                      |            | 3.6066(1)  | 46.915(5)                | -                          | 0.10(2)   | -         | 2.0                                             | 6.8                                            | 13.1                   | 11.7         | 0.07(4) | 0.26(5)       |
|       | 16551 | 4:10:39                         | 3.7                  |            | 3.6066(1)  | 46.915(5)                | -                          | 0.139(13) | 0.011(13) | 1.2                                             | 6.7                                            | 17.0                   | 13.2         | 0.16(0) | 0.58(3)       |
|       | 16552 | 5:47:18                         |                      |            | 3.6066(1)  | 46.918(6)                | -                          | 0.145(14) | 0.011(12) | 1.3                                             | 3.4                                            | 24.2                   | 16.5         | 0.17(3) | 0.59(3)       |
|       | 16553 | 6:56:22                         |                      |            | 3.6067(1)  | 46.917(6)                | -                          | 0.135(14) | 0.015(13) | 1.3                                             | 4.1                                            | 22.1                   | 15.4         | 0.17(3) | 0.59(3)       |
|       | 16555 | 8:30:44                         | 3.6                  |            | 3.6066(1)  | 46.914(6)                | -                          | 0.136(14) | 0.014(13) | 1.3                                             | 4.2                                            | 17.9                   | 14.1         | 0.16(3) | 0.58(3)       |
|       | 16556 | 9:45:23                         |                      |            | 3.6065(1)  | 46.911(5)                | -                          | 0.114(9)  | -         | 1.2                                             | 4.7                                            | 13.7                   | 11.9         | 0.11(1) | 0.41(2)       |

3.7
